# Supplementary material for: Doping engineering of conductive polymer hydrogels and their application in advanced sensor technologies
Source: Royal Society of Chemistry journal article supplement (doi:10.1039/c9sc02033k), 2019-01-01
Supplement: c9sc02033k1.pdf [file c9sc02033k1.pdf]

# Doping stretchy electronic hydrogels to create biocompatible sensors

Conductive polymer hydrogels (CPHs) are emerging sensor technologies:

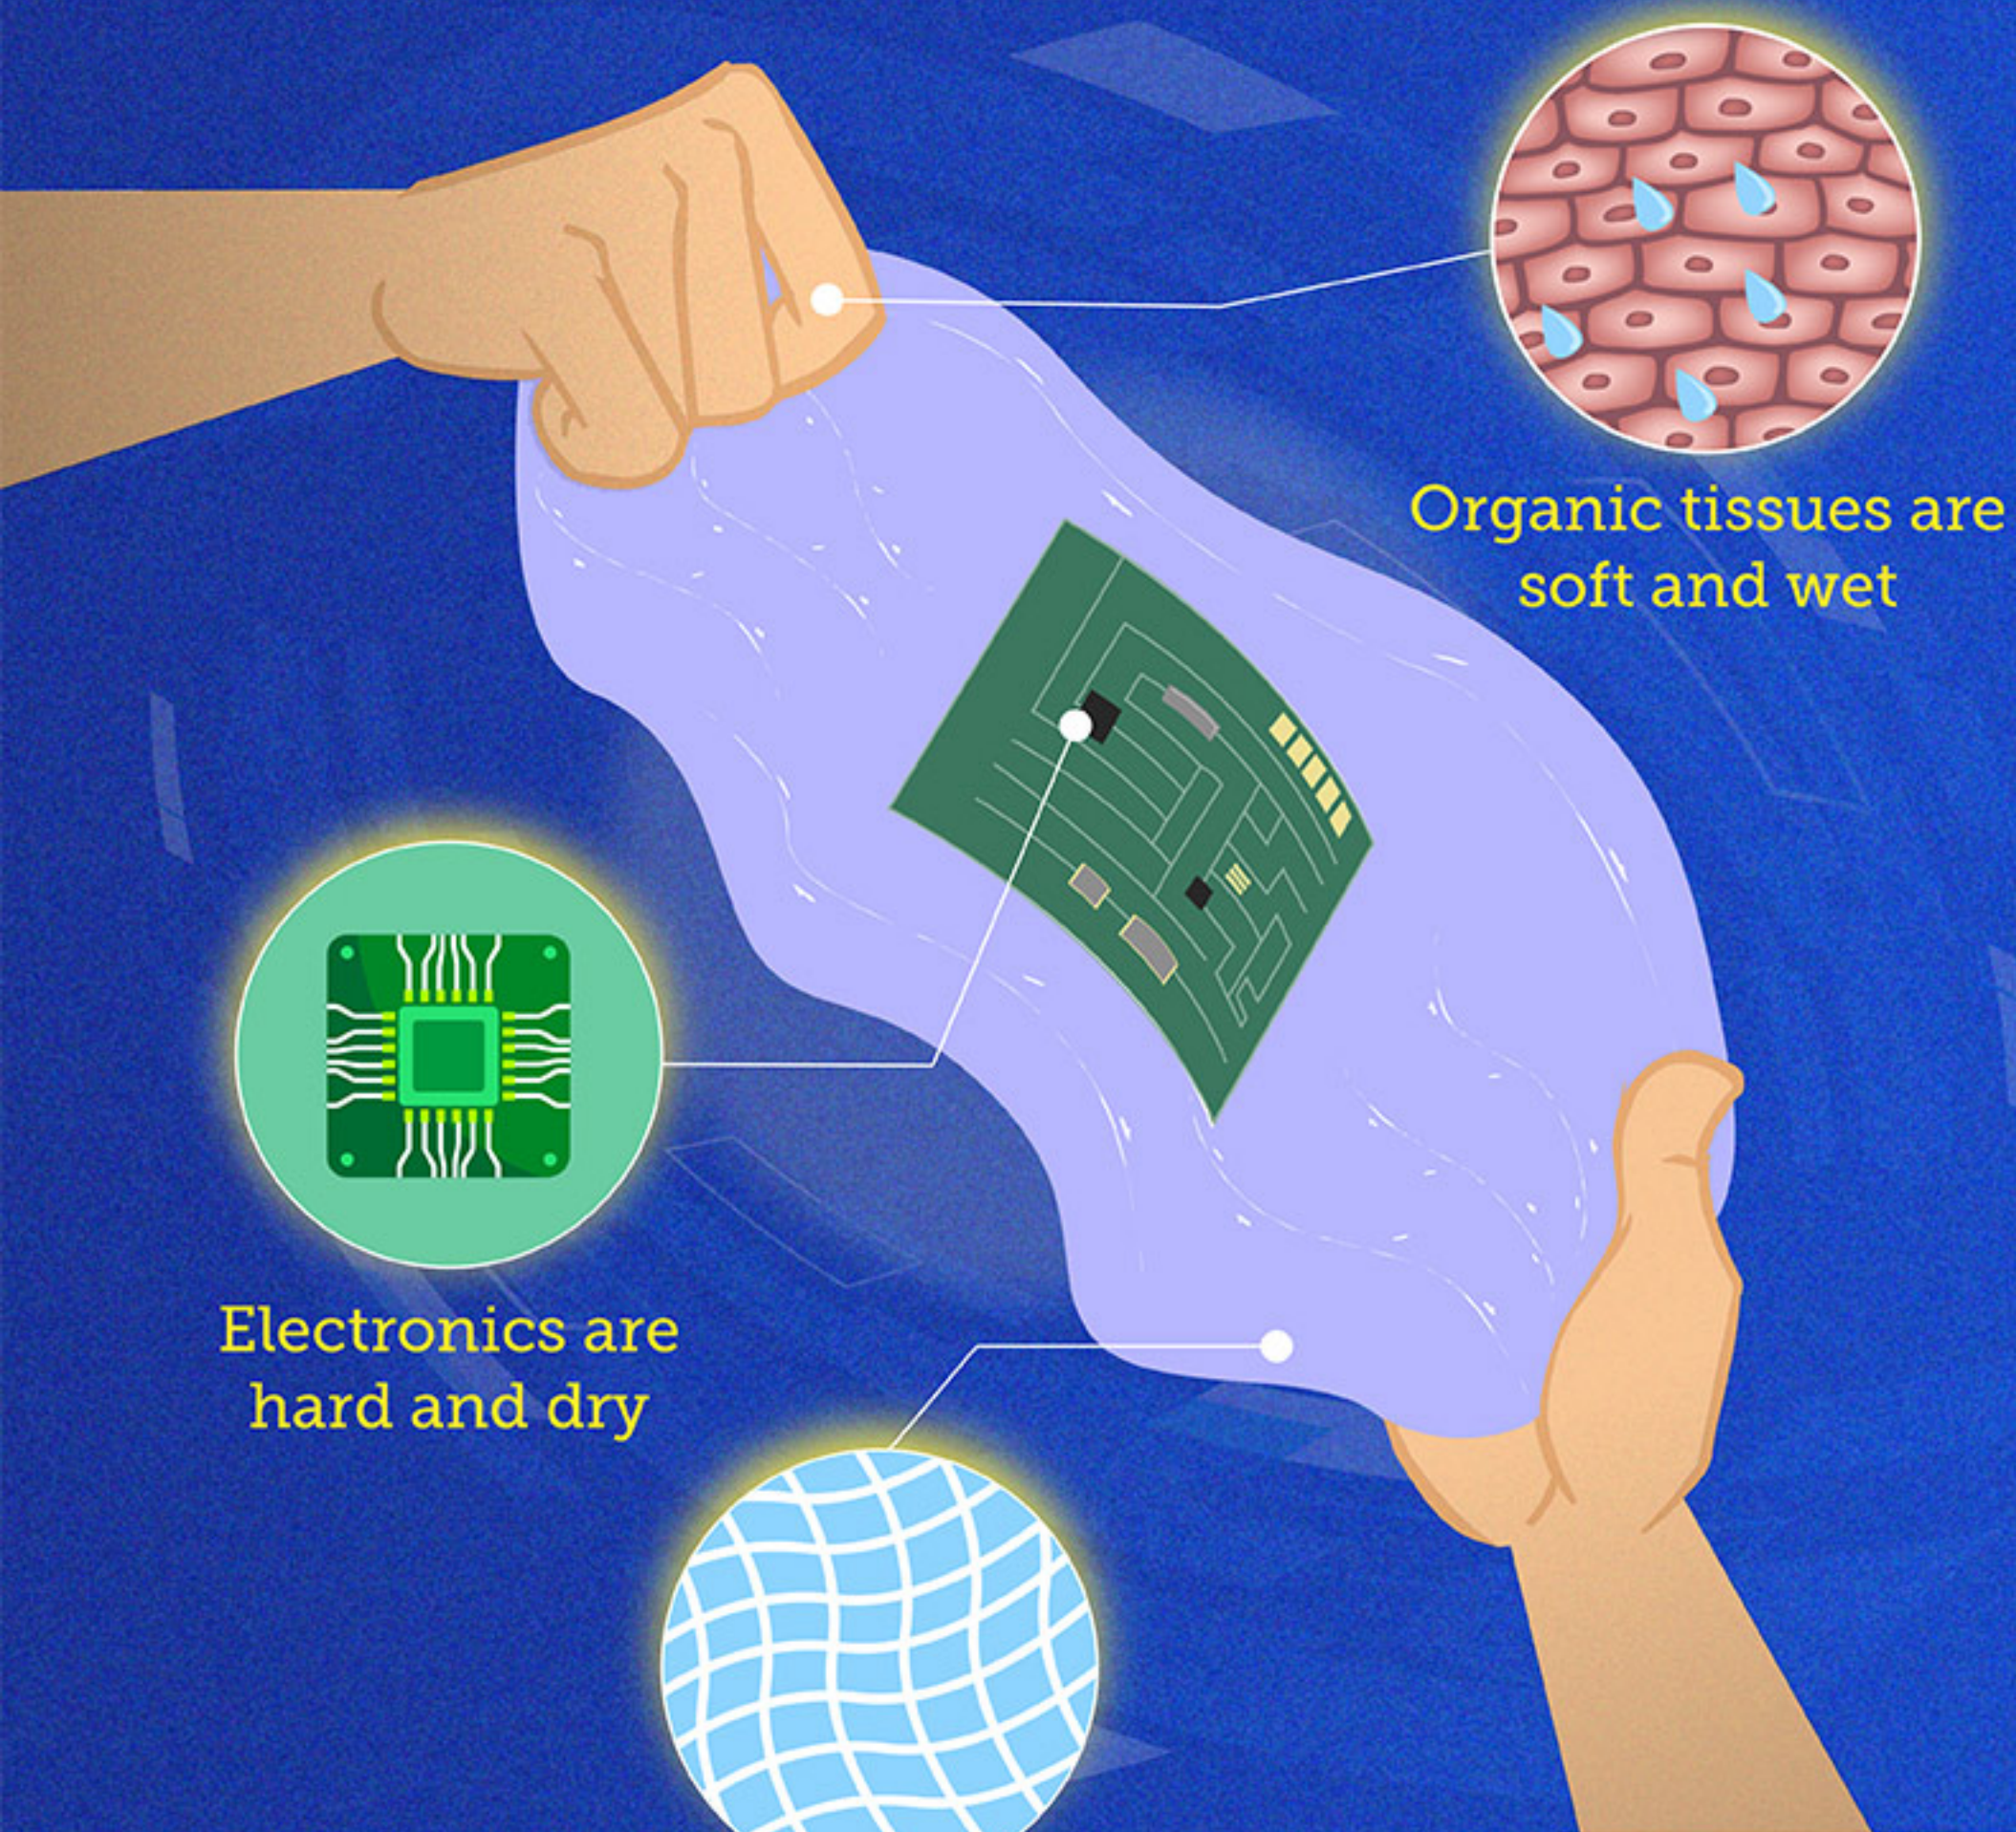

CPHs synergise the electronic and mechanical properties of both

## Doping for tunability:

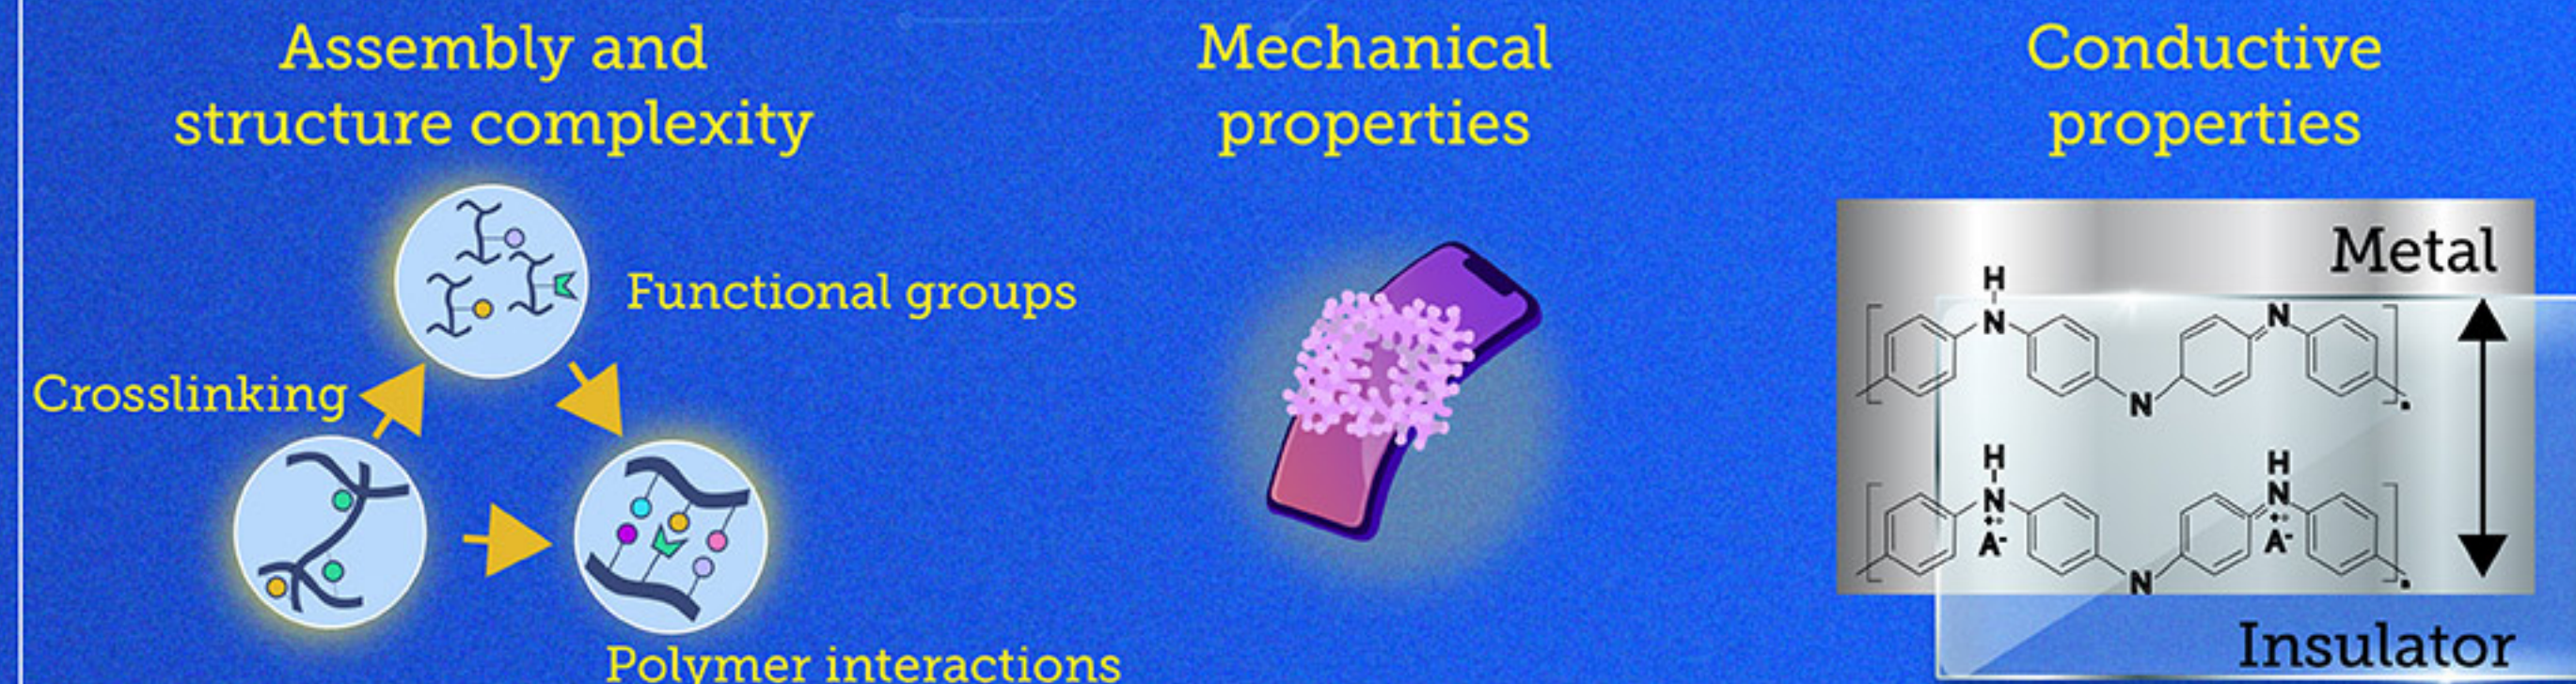

## CPHs and the future of sensors:

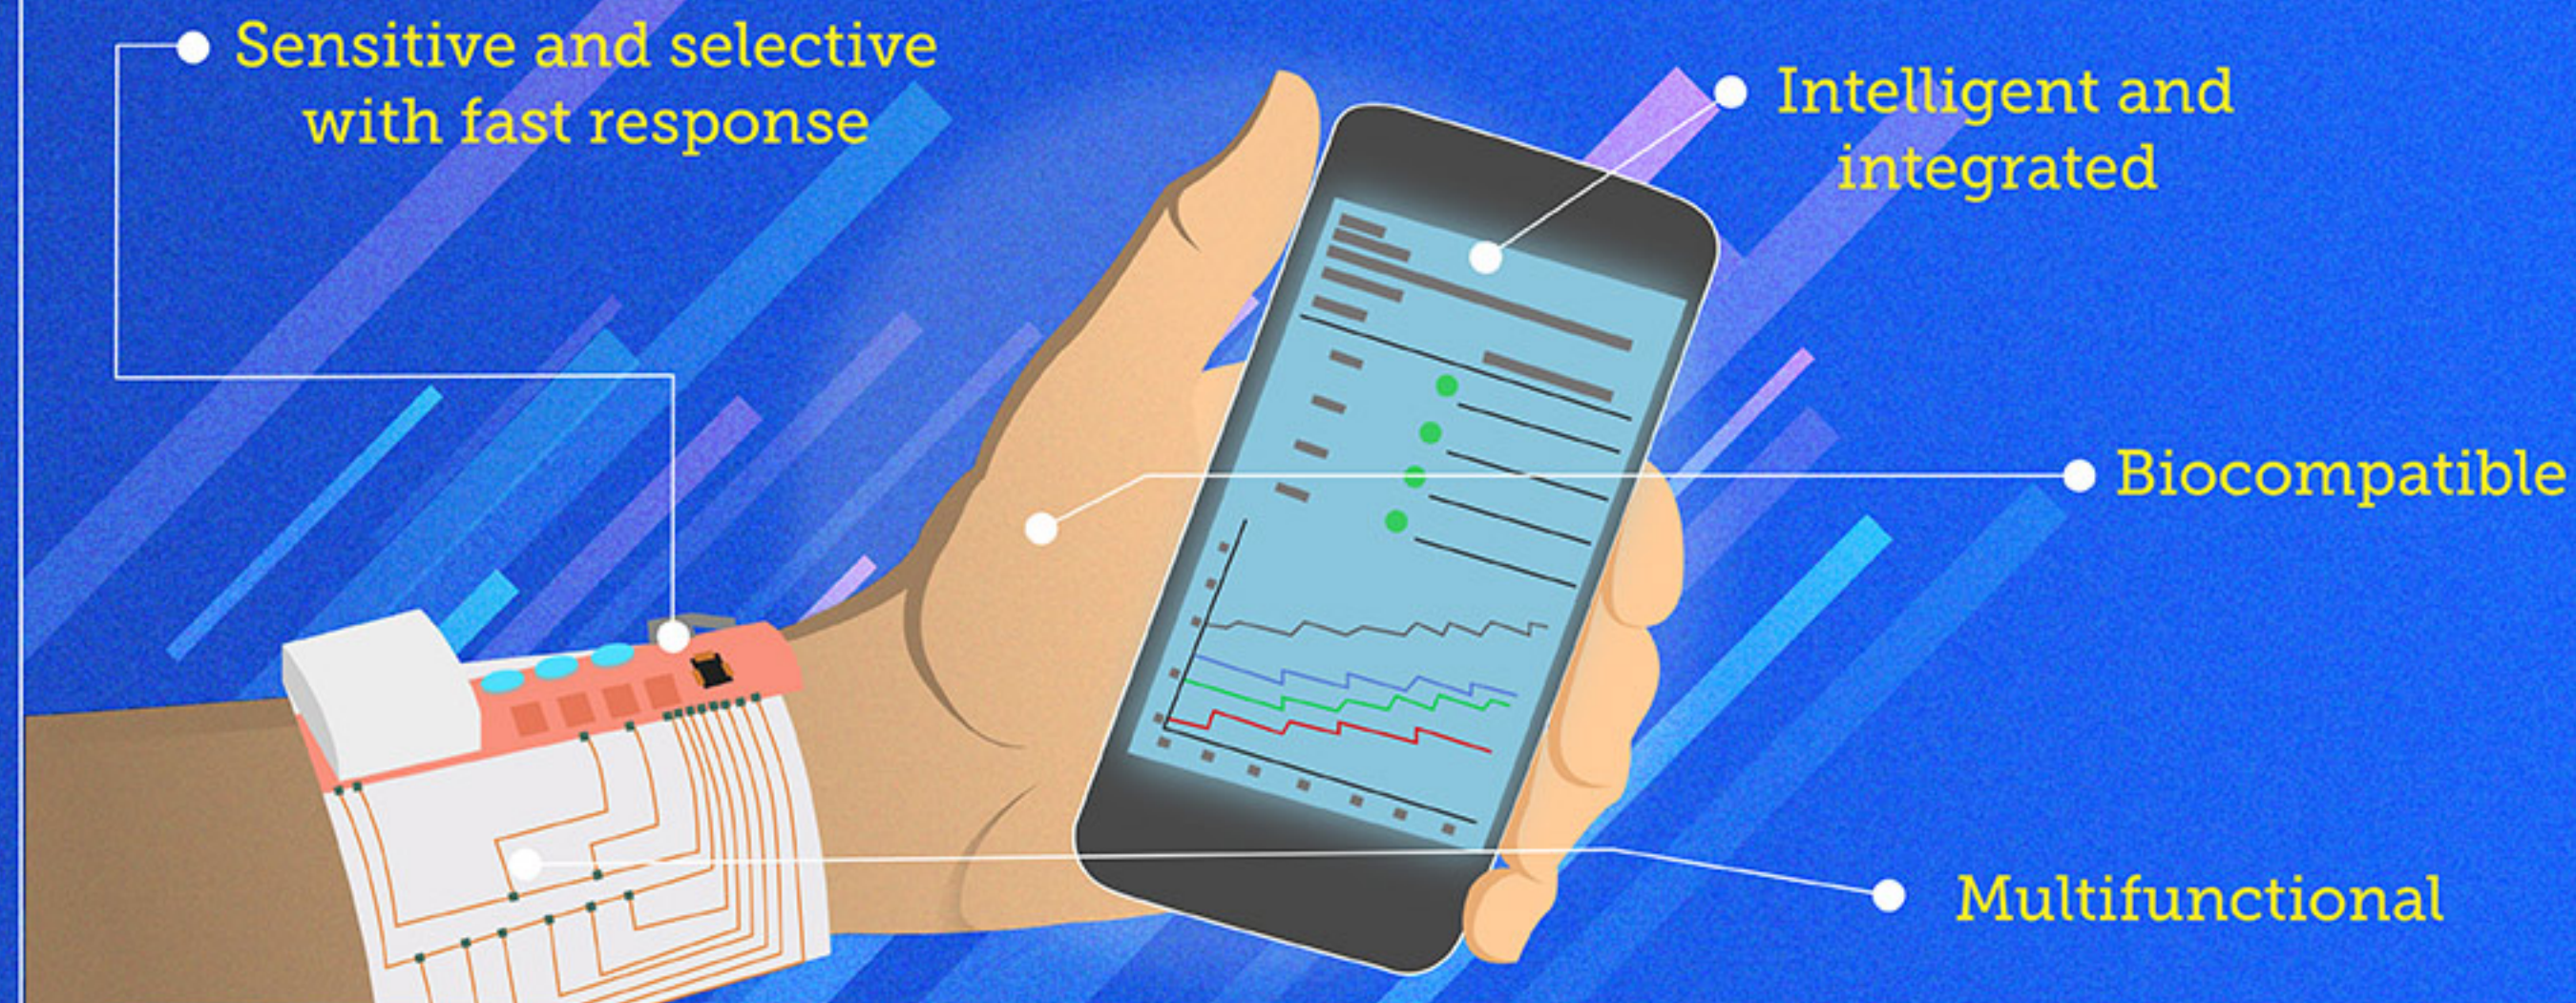

With their biocompatibility and abundant sensor applications, CPHs have the potential of revolutionising the medical world.
